# Supplementary material
Source: Springer Nature journal article supplement (https://www.springermedizin.de/resource/supplementary/12967_2010_703_MOESM2_ESM.pdf/9577314)

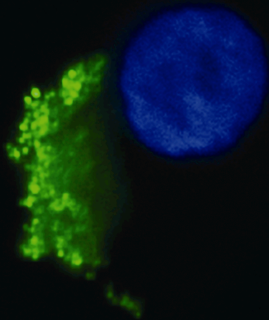

A

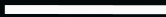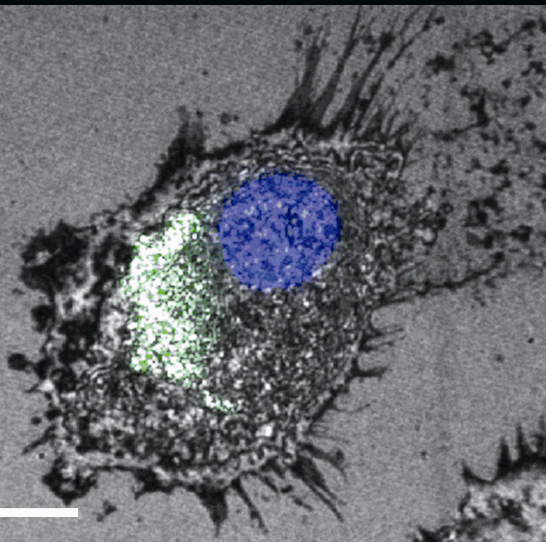

B

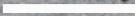

Supplement: MOESM2 [file 9577314]
